# Supplementary material for: Global minimum and a heap of low-lying isomers with planar tetracoordinate carbon in the CAl3MgH2− system
Source: Royal Society of Chemistry journal article supplement (doi:10.1039/d3cp05841g), 2024-01-01
Supplement: d3cp05841g1.pdf [file d3cp05841g1.pdf]

## **Supporting information for:**

### **Global minimum and a heap of low-lying isomers with planar tetracoordinate carbon in $\text{CAl}_3\text{MgH}_2^-$ system**

Abdul Hamid Malhan and Krishnan Thirumoorthy\*

Department of Chemistry, School of Advanced Sciences, Vellore Institute of Technology,  
Vellore 632 014, Tamil Nadu, India. E-mail: [thirumoorthy.krishnan@vit.ac.in](mailto:thirumoorthy.krishnan@vit.ac.in)

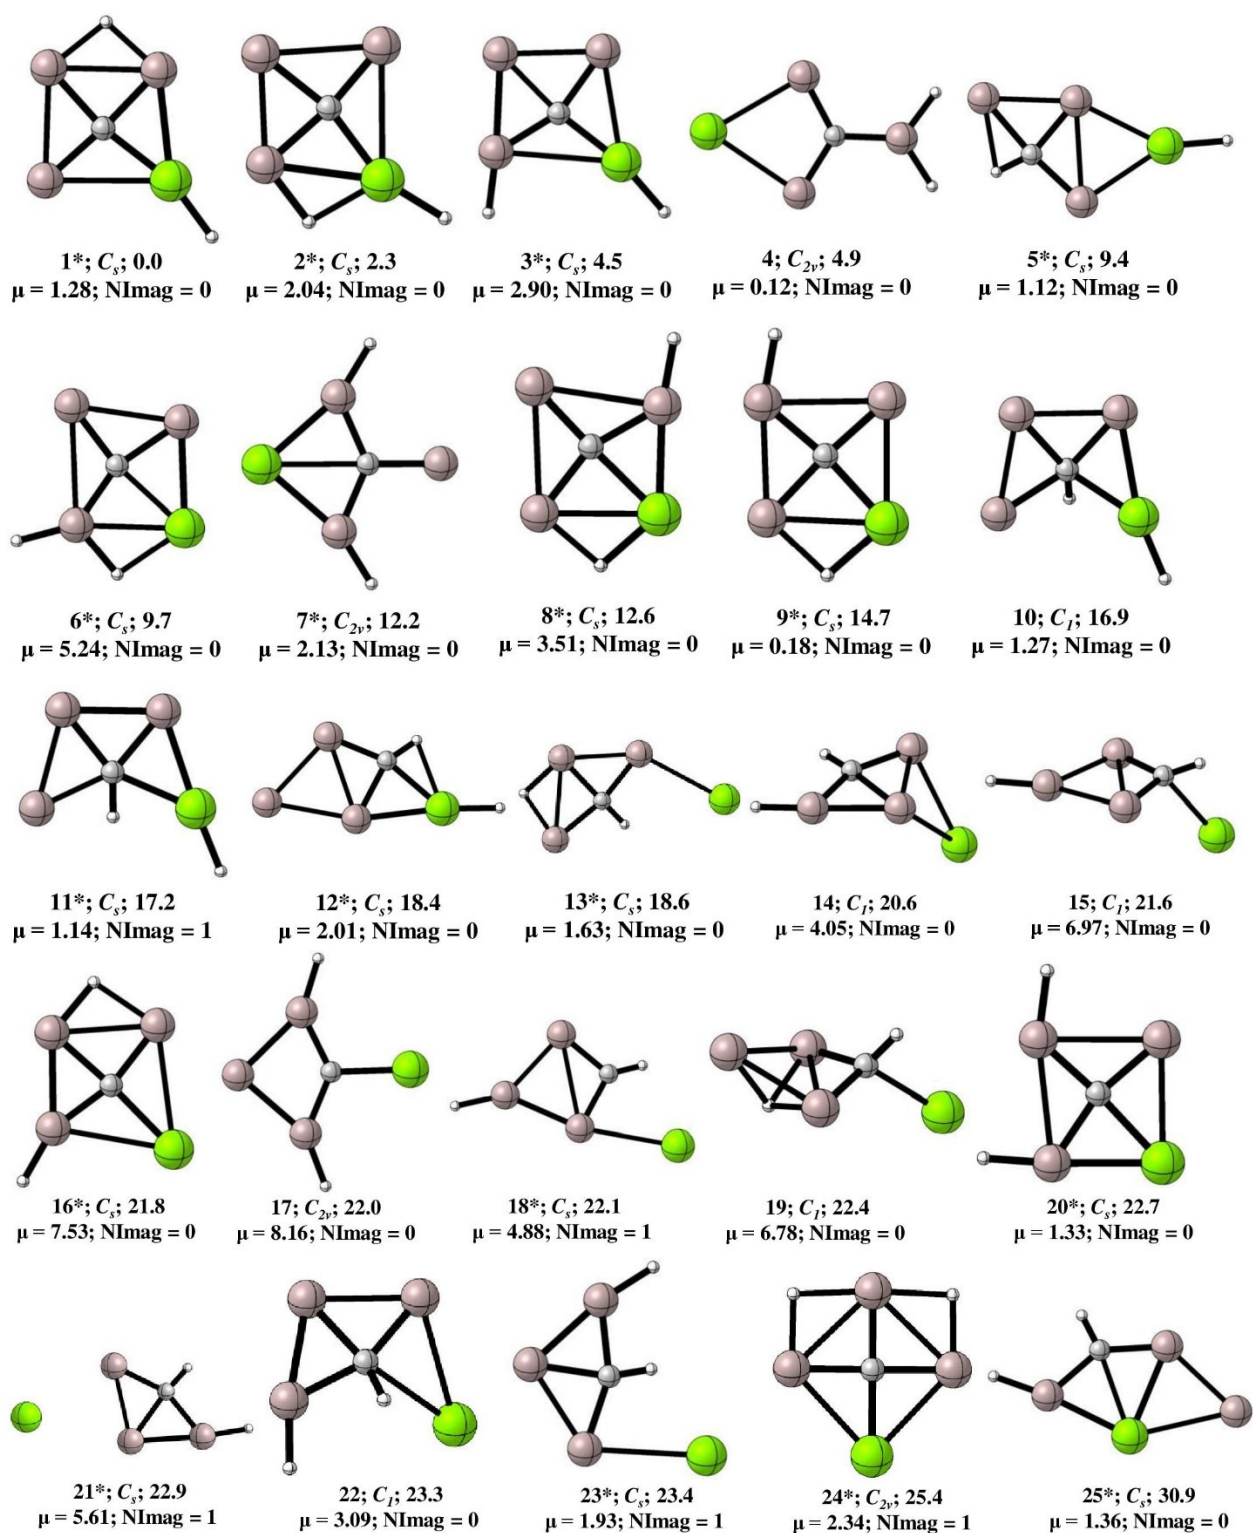

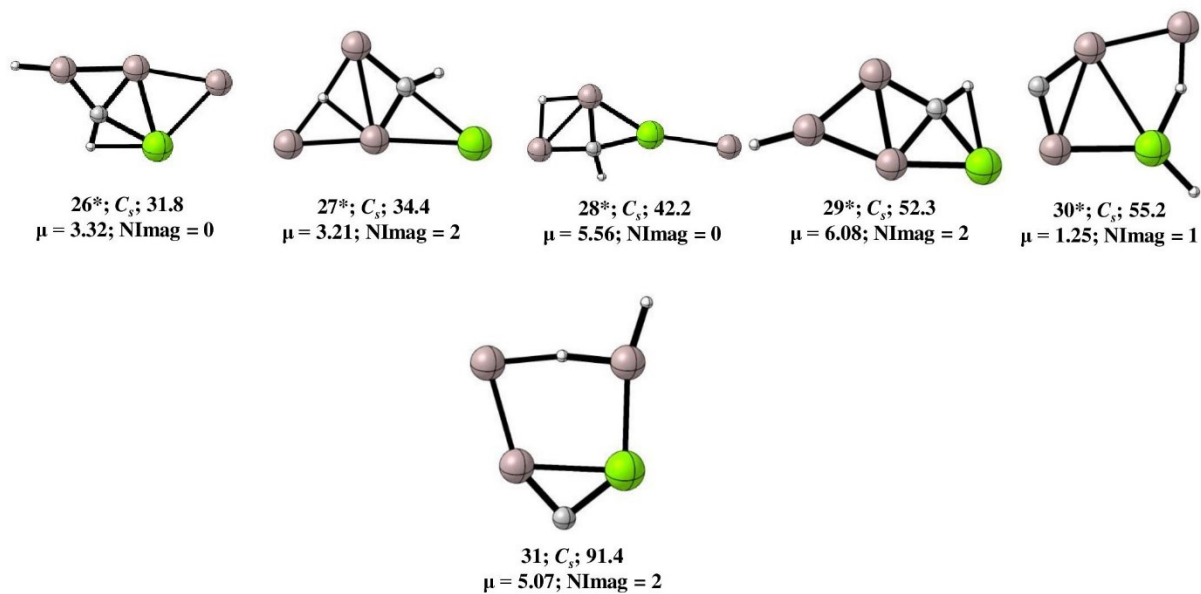

**Figure S1.** Isomers of  $CA_{13}MgH_2^-$  on the PES with their zero-point vibrational energy (ZPVE) corrected relative energies (in  $\text{kcal mol}^{-1}$ ), dipole moments (in Debye), and the number of imaginary frequencies (NImag) calculated at MP2/aug-cc-pVTZ level. The ptCs, ppCs and ptAl are marked with asterisk.

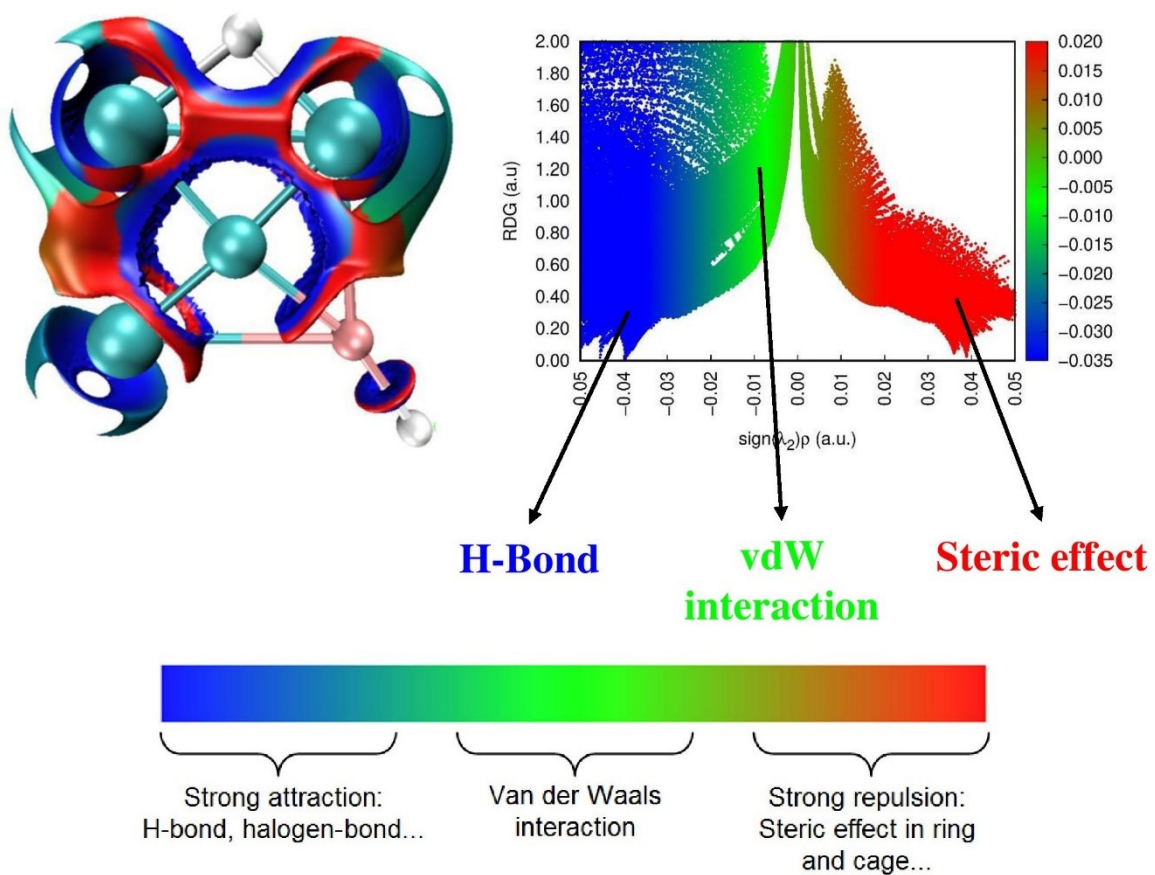

**Figure S2.** Noncovalent interaction (NCI) analysis of isomer **1** carried out at MP2/aug-cc-pVTZ level.

**Table S1.** Comparison of the relative energies ( $\Delta E + \text{ZPVE}$ ) of  $\text{CaI}_3\text{MgH}_2^-$  isomers optimized at both the MP2/aug-cc-pVTZ, MP2/6-311++G(2d,2p) levels, and single point energy calculation at the CCSD(T)/aug-cc-pVTZ//MP2/aug-cc-pVTZ level.

| $\Delta E + \text{ZPVE}$ (kcal mol <sup>-1</sup> ) |                 |                     |                                          |
|----------------------------------------------------|-----------------|---------------------|------------------------------------------|
| Isomers                                            | MP2/aug-cc-pVTZ | MP2/6-311++G(2d,2p) | CCSD(T)/aug-cc-pVTZ//<br>MP2/aug-cc-pVTZ |
| 1                                                  | 0               | 0                   | 0                                        |
| 2                                                  | 2.3             | 2.2                 | 1.7                                      |
| 3                                                  | 4.5             | 2.6                 | 7.3                                      |
| 4                                                  | 4.9             | 5.4                 | 3.3                                      |
| 5                                                  | 9.4             | 8.7                 | 8.1                                      |
| 6                                                  | 9.7             | 10.3                | 7.6                                      |
| 7                                                  | 12.2            | 11.8                | 11.9                                     |
| 8                                                  | 12.6            | 12.5                | 11.7                                     |
| 9                                                  | 14.7            | 15.1                | 19.2                                     |
| 10                                                 | 16.9            | 18.0                | 16.1                                     |
| 11                                                 | 17.2            | 18.1                | 13.6                                     |
| 12                                                 | 18.4            | 18.8                | 15.9                                     |
| 13                                                 | 18.6            | 19.4                | 17.3                                     |
| 14                                                 | 20.6            | 20.9                | 17.7                                     |
| 15                                                 | 21.6            | 21.1                | 18.5                                     |
| 16                                                 | 21.8            | 21.7                | 17.5                                     |
| 17                                                 | 22.0            | 21.8                | 21.1                                     |
| 18                                                 | 22.1            | 22.0                | 24.1                                     |
| 19                                                 | 22.4            | 22.1                | 21.7                                     |
| 20                                                 | 22.7            | 23.0                | 26.5                                     |
| 21                                                 | 22.9            | 23.0                | 19.4                                     |
| 22                                                 | 23.3            | 23.4                | 20.4                                     |
| 23                                                 | 23.4            | 23.7                | 20.8                                     |
| 24                                                 | 25.4            | 26.0                | 30.0                                     |

|    |      |      |      |
|----|------|------|------|
| 25 | 30.9 | 31.6 | 25.9 |
| 26 | 31.8 | 32.7 | 27.0 |
| 27 | 34.4 | 33.3 | 28.8 |
| 28 | 42.2 | 42.0 | 34.9 |
| 29 | 52.3 | 54.8 | 52.2 |
| 30 | 55.2 | 56.2 | 56.1 |
| 31 | 91.4 | 91.1 | 86.5 |

**Table S2.** Total energy (in a.u), zero-point vibrational energy (ZPVE; in a.u), ZPVE corrected total energy (E+ZPVE; in a.u), relative energy ( $\Delta E + ZPVE$ ; in kcal mol<sup>-1</sup>), dipole moment (in Debye) and the number of imaginary frequencies (NImag) of CAI<sub>3</sub>MgH<sub>2</sub><sup>-</sup> isomers calculated at MP2/aug-cc-pVTZ level.

| MP2/aug-cc-pVTZ |                 |               |                 |                                              |                          |       |
|-----------------|-----------------|---------------|-----------------|----------------------------------------------|--------------------------|-------|
| Isomer          | Energy<br>(a.u) | ZPVE<br>(a.u) | E+ZPVE<br>(a.u) | $\Delta E+ZPVE$<br>(kcal mol <sup>-1</sup> ) | Dipole moment<br>(Debye) | NImag |
| 1               | -964.86246      | 0.018395      | -964.84407      | 0                                            | 1.28                     | 0     |
| 2               | -964.85874      | 0.018301      | -964.84044      | 2.3                                          | 2.04                     | 0     |
| 3               | -964.85484      | 0.018022      | -964.83682      | 4.5                                          | 2.9                      | 0     |
| 4               | -964.85555      | 0.019246      | -964.8363       | 4.9                                          | 0.12                     | 0     |
| 5               | -964.84993      | 0.02078       | -964.82915      | 9.4                                          | 1.12                     | 0     |
| 6               | -964.84825      | 0.019649      | -964.8286       | 9.7                                          | 5.24                     | 0     |
| 7               | -964.84381      | 0.019255      | -964.82455      | 12.2                                         | 2.13                     | 0     |
| 8               | -964.84265      | 0.01865       | -964.82399      | 12.6                                         | 3.51                     | 0     |
| 9               | -964.83925      | 0.018619      | -964.82063      | 14.7                                         | 0.18                     | 0     |
| 10              | -964.83743      | 0.020278      | -964.81715      | 16.9                                         | 1.27                     | 0     |
| 11              | -964.83703      | 0.020312      | -964.81672      | 17.2                                         | 1.14                     | 1     |
| 12              | -964.83568      | 0.02097       | -964.81471      | 18.4                                         | 2.01                     | 0     |
| 13              | -964.83621      | 0.021787      | -964.81442      | 18.6                                         | 1.63                     | 0     |
| 14              | -964.83215      | 0.020916      | -964.81123      | 20.6                                         | 4.05                     | 0     |
| 15              | -964.83188      | 0.022192      | -964.80969      | 21.6                                         | 6.97                     | 0     |
| 16              | -964.828        | 0.018751      | -964.80925      | 21.8                                         | 7.53                     | 0     |
| 17              | -964.82825      | 0.019306      | -964.80894      | 22.0                                         | 8.16                     | 0     |
| 18              | -964.83103      | 0.02212       | -964.80891      | 22.1                                         | 4.88                     | 1     |
| 19              | -964.8308       | 0.022437      | -964.80836      | 22.4                                         | 6.78                     | 0     |
| 20              | -964.82682      | 0.018999      | -964.80782      | 22.7                                         | 1.33                     | 0     |
| 21              | -964.82827      | 0.020709      | -964.80756      | 22.9                                         | 5.61                     | 1     |
| 22              | -964.82788      | 0.021016      | -964.80686      | 23.3                                         | 3.09                     | 0     |
| 23              | -964.82772      | 0.020986      | -964.80673      | 23.4                                         | 1.93                     | 1     |

|    |            |          |            |      |      |   |
|----|------------|----------|------------|------|------|---|
| 24 | -964.82265 | 0.01908  | -964.80357 | 25.4 | 2.34 | 1 |
| 25 | -964.81604 | 0.021312 | -964.79473 | 30.9 | 1.36 | 0 |
| 26 | -964.81488 | 0.021584 | -964.7933  | 31.8 | 3.32 | 0 |
| 27 | -964.81007 | 0.020816 | -964.78925 | 34.4 | 3.21 | 2 |
| 28 | -964.79868 | 0.02189  | -964.77679 | 42.2 | 5.56 | 0 |
| 29 | -964.78135 | 0.020601 | -964.76075 | 52.3 | 6.08 | 2 |
| 30 | -964.77278 | 0.016644 | -964.75614 | 55.2 | 1.25 | 1 |
| 31 | -964.71558 | 0.017187 | -964.69839 | 91.4 | 5.07 | 1 |



**Table S3.** Total energy (in a.u), zero-point vibrational energy (ZPVE; in a.u), ZPVE corrected total energy (E+ZPVE; in a.u), relative energy ( $\Delta E + ZPVE$ ; in kcal mol<sup>-1</sup>), dipole moment (in Debye) and the number of imaginary frequencies (NImag) of CAI<sub>3</sub>MgH<sub>2</sub><sup>-</sup> isomers calculated at MP2/6-311++G(2d,2p) level.

| MP2/6-311++G(2d,2p) |                 |               |                 |                                              |                          |       |
|---------------------|-----------------|---------------|-----------------|----------------------------------------------|--------------------------|-------|
| Isomer              | Energy<br>(a.u) | ZPVE<br>(a.u) | E+ZPVE<br>(a.u) | $\Delta E+ZPVE$<br>(kcal mol <sup>-1</sup> ) | Dipole moment<br>(Debye) | NImag |
| 1                   | -964.79289      | 0.018504      | -964.77438      | 0                                            | 1.27                     | 0     |
| 2                   | -964.78922      | 0.018378      | -964.77085      | 2.2                                          | 1.99                     | 0     |
| 3                   | -964.78379      | 0.017941      | -964.76585      | 2.6                                          | 2.91                     | 0     |
| 4                   | -964.78951      | 0.019255      | -964.77025      | 5.4                                          | 0.12                     | 0     |
| 5                   | -964.77871      | 0.020739      | -964.75797      | 8.7                                          | 1.06                     | 0     |
| 6                   | -964.78025      | 0.019702      | -964.76055      | 10.3                                         | 5.16                     | 0     |
| 7                   | -964.7748       | 0.019269      | -964.75553      | 11.8                                         | 2.11                     | 0     |
| 8                   | -964.77313      | 0.018739      | -964.75439      | 12.5                                         | 3.53                     | 0     |
| 9                   | -964.769        | 0.018702      | -964.7503       | 15.1                                         | 0.32                     | 0     |
| 10                  | -964.76442      | 0.021009      | -964.74341      | 18.0                                         | 1.93                     | 0     |
| 11                  | -964.76721      | 0.021561      | -964.74564      | 18.1                                         | 1.64                     | 0     |
| 12                  | -964.76577      | 0.020271      | -964.7455       | 18.8                                         | 1.3                      | 0     |
| 13                  | -964.76464      | 0.020193      | -964.74445      | 19.4                                         | 1.11                     | 1     |
| 14                  | -964.76179      | 0.020769      | -964.74102      | 20.9                                         | 3.91                     | 0     |
| 15                  | -964.76304      | 0.022239      | -964.7408       | 21.1                                         | 6.85                     | 0     |
| 16                  | -964.76176      | 0.022445      | -964.73931      | 21.7                                         | 6.63                     | 0     |
| 17                  | -964.76204      | 0.022179      | -964.73986      | 21.8                                         | 4.65                     | 1     |
| 18                  | -964.75854      | 0.019347      | -964.7392       | 22.0                                         | 8.16                     | 0     |
| 19                  | -964.75847      | 0.018823      | -964.73965      | 22.1                                         | 7.56                     | 0     |
| 20                  | -964.75676      | 0.018984      | -964.73777      | 23.0                                         | 1.48                     | 0     |
| 21                  | -964.75829      | 0.02052       | -964.73777      | 23.0                                         | 5.36                     | 1     |

|    |            |          |            |      |      |   |
|----|------------|----------|------------|------|------|---|
| 22 | -964.75796 | 0.020929 | -964.73703 | 23.4 | 3.16 | 0 |
| 23 | -964.75753 | 0.020857 | -964.73667 | 23.7 | 1.77 | 1 |
| 24 | -964.75204 | 0.019094 | -964.73295 | 26.0 | 2.56 | 1 |
| 25 | -964.74517 | 0.021191 | -964.72398 | 31.6 | 1.23 | 0 |
| 26 | -964.74385 | 0.021587 | -964.72226 | 32.7 | 3.17 | 0 |
| 27 | -964.74208 | 0.020836 | -964.72124 | 33.3 | 3.04 | 2 |
| 28 | -964.7291  | 0.021671 | -964.70743 | 42.0 | 5.72 | 0 |
| 29 | -964.70537 | 0.020663 | -964.68471 | 54.8 | 5.95 | 2 |
| 30 | -964.70349 | 0.016538 | -964.68695 | 56.2 | 1.45 | 1 |
| 31 | -964.64614 | 0.017014 | -964.62912 | 91.1 | 5.16 | 2 |

**Table S4.** Cartesian coordinates (in Angström units) for optimized geometries of  $\text{CaI}_3\text{MgH}_2^-$  isomers obtained at MP2/aug-cc-pVTZ level.

|          |           |           |           |           |           |           |           |
|----------|-----------|-----------|-----------|-----------|-----------|-----------|-----------|
| <b>1</b> |           |           |           | <b>2</b>  |           |           |           |
| Mg       | 2.129145  | 0.128233  | 0.000000  | Mg        | 2.094570  | -0.211349 | 0.000000  |
| C        | 0.005034  | 0.120095  | 0.000000  | C         | 0.008906  | 0.175146  | 0.000000  |
| Al       | -0.355035 | 2.028787  | 0.000000  | Al        | -0.111045 | 2.097210  | 0.000000  |
| Al       | 0.202900  | -1.864824 | 0.000000  | H         | 1.479606  | -2.136949 | 0.000000  |
| Al       | -1.986210 | -0.230500 | 0.000000  | Al        | -2.049047 | 0.009880  | 0.000000  |
| H        | 3.798379  | 0.607614  | 0.000000  | H         | 3.805280  | 0.115327  | 0.000000  |
| H        | -1.571118 | -2.003257 | 0.000000  | Al        | -0.195300 | -1.819891 | 0.000000  |
| <b>3</b> |           |           |           | <b>4</b>  |           |           |           |
| Mg       | -0.655715 | 2.139788  | 0.000000  | Mg        | 0.000000  | 0.000000  | -2.887996 |
| C        | 0.009701  | 0.175541  | 0.000000  | C         | 0.000000  | 0.000000  | 0.624260  |
| Al       | -1.859751 | -0.507539 | 0.000000  | Al        | 0.000000  | 1.650622  | -0.332614 |
| Al       | 1.911697  | 0.050988  | 0.000000  | H         | 0.000000  | -1.325201 | 3.432292  |
| Al       | 0.347610  | -1.953296 | 0.000000  | Al        | 0.000000  | 0.000000  | 2.515104  |
| H        | 3.052318  | 1.183520  | 0.000000  | H         | 0.000000  | 1.325201  | 3.432292  |
| H        | -0.820395 | 3.872118  | 0.000000  | Al        | 0.000000  | -1.650622 | -0.332614 |
| <b>5</b> |           |           |           | <b>6</b>  |           |           |           |
| Mg       | 2.646948  | 0.087721  | 0.000000  | Mg        | 0.132726  | -2.102566 | 0.000000  |
| Al       | 0.002049  | 1.074479  | 0.000000  | C         | 0.007335  | 0.231621  | 0.000000  |
| Al       | -2.594238 | 0.903470  | 0.000000  | Al        | -1.947054 | -0.315669 | 0.000000  |
| Al       | 0.476235  | -1.724852 | 0.000000  | H         | 3.182460  | 0.997405  | 0.000000  |
| C        | -1.093694 | -0.555036 | 0.000000  | Al        | -0.491112 | 2.123460  | 0.000000  |
| H        | 4.366298  | 0.426337  | 0.000000  | Al        | 1.869276  | 0.094778  | 0.000000  |
| H        | -2.008342 | -1.177366 | 0.000000  | H         | 2.173795  | -1.563601 | 0.000000  |
| <b>7</b> |           |           |           | <b>8</b>  |           |           |           |
| C        | 0.000000  | 0.000000  | 0.480939  | Al        | -0.170627 | 2.161479  | 0.000000  |
| Al       | 0.000000  | 0.000000  | 2.394721  | C         | 0.001598  | 0.226166  | 0.000000  |
| Al       | 0.000000  | 1.755998  | -0.291357 | Al        | 1.988113  | 0.084489  | 0.000000  |
| Mg       | 0.000000  | 0.000000  | -2.283863 | Al        | -1.836623 | -0.374190 | 0.000000  |
| Al       | 0.000000  | -1.755998 | -0.291357 | Mg        | 0.112065  | -2.029724 | 0.000000  |
| H        | 0.000000  | -3.130802 | 0.546559  | H         | 1.943589  | -1.839815 | 0.000000  |
| H        | 0.000000  | 3.130802  | 0.546559  | H         | -3.189942 | 0.499890  | 0.000000  |
| <b>9</b> |           |           |           | <b>10</b> |           |           |           |
| Al       | -1.851155 | 0.651717  | 0.000000  | Mg        | -2.015398 | -0.939151 | -0.171243 |
| C        | 0.001214  | 0.082830  | 0.000000  | C         | 0.029176  | -0.154389 | 0.349298  |
| Al       | 0.805975  | 1.868328  | 0.000000  | Al        | 1.649467  | -1.470744 | 0.076227  |
| Al       | -0.688607 | -1.807399 | 0.000000  | Al        | -1.056501 | 1.566453  | 0.097664  |
| Mg       | 1.956869  | -0.789056 | 0.000000  | Al        | 1.522151  | 1.157634  | -0.198040 |
| H        | -2.237358 | 2.240833  | 0.000000  | H         | -0.157850 | -1.022255 | 1.043020  |
| H        | 1.177738  | -2.484545 | 0.000000  | H         | -2.925734 | -2.405249 | -0.372095 |

|           |           |           |           |           |           |           |           |
|-----------|-----------|-----------|-----------|-----------|-----------|-----------|-----------|
| <b>11</b> |           |           |           | <b>12</b> |           |           |           |
| Mg        | 2.297491  | 0.659888  | 0.000000  | Mg        | 2.630202  | 0.814962  | 0.000000  |
| C         | -0.000933 | 0.263549  | 0.000000  | Al        | -0.002647 | 0.951641  | 0.000000  |
| Al        | -1.706709 | 1.582135  | 0.000000  | Al        | -2.678506 | 0.282498  | 0.000000  |
| Al        | 0.903679  | -1.568575 | 0.000000  | C         | 1.034202  | -0.756526 | 0.000000  |
| Al        | -1.608403 | -1.016188 | 0.000000  | Al        | -0.711568 | -1.594713 | 0.000000  |
| H         | 0.271673  | 1.365939  | 0.000000  | H         | 4.371162  | 0.907674  | 0.000000  |
| H         | 3.319518  | 2.069018  | 0.000000  | H         | 1.974826  | -1.335431 | 0.000000  |
| <b>13</b> |           |           |           | <b>14</b> |           |           |           |
| H         | -1.102346 | -0.461951 | 0.000000  | C         | -0.908079 | 0.823272  | -0.359262 |
| C         | -0.004699 | -0.545425 | 0.000000  | Al        | 0.894208  | 1.539082  | 0.180841  |
| Al        | 0.000281  | -2.570307 | 0.000000  | Al        | -2.348140 | -0.502009 | -0.314240 |
| Al        | 0.433418  | 1.426057  | 0.000000  | Al        | -0.222560 | -0.681756 | 0.912676  |
| Al        | 1.951995  | -0.663464 | 0.000000  | H         | -1.266565 | 1.567502  | -1.088538 |
| H         | 1.880502  | -2.392809 | 0.000000  | Mg        | 2.680889  | -0.892895 | -0.485550 |
| Mg        | -2.615993 | 2.404684  | 0.000000  | H         | -3.724355 | -0.368016 | -1.132011 |
| <b>15</b> |           |           |           | <b>16</b> |           |           |           |
| Mg        | 2.917192  | -0.001092 | -0.587352 | Mg        | 0.717293  | 2.349769  | 0.000000  |
| Al        | -0.314570 | -1.519048 | 0.308390  | C         | -0.004040 | 0.143716  | 0.000000  |
| C         | 0.805094  | 0.007849  | 0.779139  | Al        | -1.944928 | 0.474055  | 0.000000  |
| Al        | -2.264508 | -0.005469 | -0.479577 | Al        | 1.689497  | -0.668780 | 0.000000  |
| Al        | -0.324825 | 1.524848  | 0.300977  | Al        | -0.488865 | -1.850615 | 0.000000  |
| H         | 1.652336  | 0.012803  | 1.474054  | H         | -2.155819 | -1.529590 | 0.000000  |
| H         | -3.846934 | -0.012338 | -0.814339 | H         | 3.272904  | -0.727429 | 0.000000  |
| <b>17</b> |           |           |           | <b>18</b> |           |           |           |
| Mg        | 0.000000  | 0.000000  | -2.735746 | Mg        | 3.059302  | 1.372954  | 0.000000  |
| C         | 0.000000  | 0.000000  | -0.484188 | Al        | -0.006468 | 1.003632  | 0.000000  |
| Al        | 0.000000  | 1.724196  | 0.302626  | C         | 0.844404  | -0.736053 | 0.000000  |
| Al        | 0.000000  | -1.724196 | 0.302626  | Al        | -2.378582 | 0.033538  | 0.000000  |
| Al        | 0.000000  | 0.000000  | 2.156138  | Al        | -0.686999 | -1.928876 | 0.000000  |
| H         | 0.000000  | 3.233984  | -0.202452 | H         | 1.896193  | -1.041875 | 0.000000  |
| H         | 0.000000  | -3.233984 | -0.202452 | H         | -3.942766 | 0.432321  | 0.000000  |
| <b>19</b> |           |           |           | <b>20</b> |           |           |           |
| C         | -0.797041 | -0.000182 | 0.554762  | Mg        | 1.206048  | -1.789598 | 0.000000  |
| Al        | 0.325735  | -1.476073 | -0.088190 | C         | -0.000204 | 0.104872  | 0.000000  |
| Al        | 0.325677  | 1.475662  | -0.088385 | Al        | 1.696844  | 1.100854  | 0.000000  |
| Mg        | -3.039748 | -0.000308 | -0.151228 | Al        | -1.374531 | -1.310938 | 0.000000  |
| H         | -1.206146 | -0.000144 | 1.576523  | Al        | -1.154112 | 1.646552  | 0.000000  |
| Al        | 2.519815  | -0.000176 | 0.046933  | H         | -0.668360 | 3.199585  | 0.000000  |
| H         | 1.134128  | -0.000405 | -1.127337 | H         | -2.945989 | -0.910984 | 0.000000  |
| <b>21</b> |           |           |           | <b>22</b> |           |           |           |

|           |           |           |          |           |           |           |           |
|-----------|-----------|-----------|----------|-----------|-----------|-----------|-----------|
| C         | -1.350284 | -0.595235 | 0.000000 | C         | 0.053123  | 0.130576  | 0.413021  |
| Al        | 0.371334  | -1.597483 | 0.000000 | Al        | -0.835324 | -1.669681 | 0.231715  |
| Al        | -2.464155 | 1.037128  | 0.000000 | Al        | 1.536717  | 1.446195  | 0.124821  |
| Al        | -0.004835 | 0.987458  | 0.000000 | Al        | 1.629000  | -0.969454 | -0.374933 |
| H         | -2.132489 | -1.371936 | 0.000000 | H         | -0.499140 | 0.910063  | 0.971281  |
| Mg        | 3.450171  | -0.130112 | 0.000000 | Mg        | -2.665452 | 0.836275  | -0.254616 |
| H         | -4.068438 | 0.937978  | 0.000000 | H         | 1.231539  | 2.976576  | 0.523251  |
| <b>23</b> |           |           |          | <b>24</b> |           |           |           |
| C         | 0.014954  | 0.300050  | 0.000000 | Mg        | 0.000000  | 0.000000  | -2.166630 |
| Al        | -0.058725 | -1.703242 | 0.000000 | C         | 0.000000  | 0.000000  | -0.058577 |
| Al        | -0.769035 | 2.135318  | 0.000000 | Al        | 0.000000  | 1.969161  | -0.052931 |
| Al        | -2.030249 | 0.015497  | 0.000000 | Al        | 0.000000  | -1.969161 | -0.052931 |
| H         | 1.021567  | 0.758645  | 0.000000 | Al        | 0.000000  | 0.000000  | 1.858535  |
| Mg        | 2.984845  | -1.004432 | 0.000000 | H         | 0.000000  | 1.947466  | 1.772212  |
| H         | 0.255541  | 3.377201  | 0.000000 | H         | 0.000000  | -1.947466 | 1.772212  |
| <b>25</b> |           |           |          | <b>26</b> |           |           |           |
| Mg        | -0.007752 | 1.274043  | 0.000000 | Mg        | 0.751333  | -1.747053 | 0.000000  |
| C         | -1.200358 | -0.924915 | 0.000000 | C         | -1.232902 | -0.716251 | 0.000000  |
| Al        | 0.657884  | -1.371093 | 0.000000 | Al        | 0.002120  | 0.854655  | 0.000000  |
| Al        | -2.490057 | 0.562938  | 0.000000 | H         | -1.532851 | -1.784353 | 0.000000  |
| H         | -1.859999 | -1.815404 | 0.000000 | Al        | -2.449628 | 0.777726  | 0.000000  |
| Al        | 2.842734  | 0.157354  | 0.000000 | Al        | 2.767505  | 0.385351  | 0.000000  |
| H         | -4.074887 | 0.230844  | 0.000000 | H         | -4.053225 | 0.903822  | 0.000000  |
| <b>27</b> |           |           |          | <b>28</b> |           |           |           |
| C         | -0.944990 | -0.824163 | 0.000000 | Mg        | 0.000951  | 1.073629  | 0.000000  |
| Al        | 0.614528  | -2.053955 | 0.000000 | C         | -0.597512 | -0.999563 | 0.000000  |
| Al        | 0.001429  | 0.789373  | 0.000000 | H         | -1.658398 | -0.716867 | 0.000000  |
| Mg        | -3.025168 | 0.826878  | 0.000000 | Al        | 1.343991  | -1.211454 | 0.000000  |
| H         | -1.928736 | -1.299580 | 0.000000 | Al        | -0.699107 | -2.996101 | 0.000000  |
| Al        | 2.639371  | 1.032951  | 0.000000 | Al        | -0.323849 | 3.986850  | 0.000000  |
| H         | 1.617582  | -0.448800 | 0.000000 | H         | 1.168560  | -2.948651 | 0.000000  |
| <b>29</b> |           |           |          | <b>30</b> |           |           |           |
| Mg        | -2.605534 | 1.019967  | 0.000000 | Mg        | 0.247443  | -1.923027 | 0.000000  |
| Al        | 0.003226  | 0.963837  | 0.000000 | Al        | -2.208870 | -0.615497 | 0.000000  |
| C         | -1.282745 | -0.599973 | 0.000000 | C         | -1.828711 | 1.199438  | 0.000000  |
| Al        | 2.362017  | 0.028278  | 0.000000 | Al        | 2.636816  | 0.750022  | 0.000000  |
| Al        | 0.484682  | -1.563450 | 0.000000 | Al        | -0.004601 | 1.424216  | 0.000000  |
| H         | -2.119711 | -1.307734 | 0.000000 | H         | 0.724748  | -3.603119 | 0.000000  |
| H         | 3.889658  | 0.473224  | 0.000000 | H         | 1.782893  | -0.796241 | 0.000000  |

| <b>31</b> |           |           |          |  |
|-----------|-----------|-----------|----------|--|
| Mg        | -1.983313 | -0.294864 | 0.000000 |  |
| H         | 1.293842  | -1.105670 | 0.000000 |  |
| Al        | 0.007233  | 1.657970  | 0.000000 |  |
| Al        | 0.017163  | -2.252740 | 0.000000 |  |
| Al        | 2.475353  | 0.439853  | 0.000000 |  |
| C         | -1.818789 | 1.689131  | 0.000000 |  |
| H         | 0.848995  | -3.655286 | 0.000000 |  |

**Table S5.** Cartesian coordinates (in Angström units) for optimized geometries of  $\text{CAI}_3\text{MgH}_2^-$  isomers obtained at MP2/6-311++G(2d,2p) level.

| <b>1</b> |           |           |           | <b>2</b>  |           |           |          |
|----------|-----------|-----------|-----------|-----------|-----------|-----------|----------|
| Mg       | 0.153270  | -1.916000 | 0.000000  | Mg        | 1.341600  | 1.550678  | 0.000000 |
| C        | 0.255730  | 0.205310  | 0.000000  | C         | -0.261419 | 0.158449  | 0.000000 |
| Al       | 2.177250  | 0.453930  | 0.000000  | Al        | -1.819199 | 1.285222  | 0.000000 |
| Al       | -1.736590 | 0.100920  | 0.000000  | H         | 2.459757  | -0.107302 | 0.000000 |
| Al       | -0.007500 | 2.212150  | 0.000000  | Al        | -1.413630 | -1.547808 | 0.000000 |
| H        | 0.549730  | -3.605200 | 0.000000  | H         | 2.136861  | 3.098361  | 0.000000 |
| H        | -1.792620 | 1.868060  | 0.000000  | Al        | 1.186710  | -1.238880 | 0.000000 |
| <b>3</b> |           |           |           | <b>4</b>  |           |           |          |
| Mg       | 0.000000  | 0.000000  | -2.941616 | Mg        | -1.286457 | 1.671886  | 0.000000 |
| C        | 0.000000  | 0.000000  | 0.633439  | C         | 0.012216  | 0.063225  | 0.000000 |
| Al       | 0.000000  | -1.647076 | -0.311980 | Al        | -1.470042 | -1.250614 | 0.000000 |
| H        | 0.000000  | 1.321959  | 3.431867  | Al        | 1.819219  | 0.671435  | 0.000000 |
| Al       | 0.000000  | 0.000000  | 2.518660  | Al        | 1.134073  | -1.787245 | 0.000000 |
| H        | 0.000000  | -1.321959 | 3.431867  | H         | 2.374177  | 2.179106  | 0.000000 |
| Al       | 0.000000  | 1.647076  | -0.311980 | H         | -2.091815 | 3.210757  | 0.000000 |
| <b>5</b> |           |           |           | <b>6</b>  |           |           |          |
| Mg       | 1.031084  | 1.769158  | 0.000000  | Mg        | 2.263842  | -1.079385 | 0.000000 |
| C        | -0.187555 | -0.286891 | 0.000000  | Al        | 0.322451  | 0.977534  | 0.000000 |
| Al       | -1.649696 | 1.106235  | 0.000000  | Al        | -2.100472 | 1.946091  | 0.000000 |
| H        | 2.257145  | -2.422070 | 0.000000  | Al        | -0.492261 | -1.761634 | 0.000000 |
| Al       | -1.463766 | -1.760902 | 0.000000  | C         | -1.371021 | -0.018262 | 0.000000 |
| Al       | 1.535354  | -1.003792 | 0.000000  | H         | 3.955264  | -1.536903 | 0.000000 |
| H        | 2.570085  | 0.308062  | 0.000000  | H         | -2.469333 | -0.141320 | 0.000000 |
| <b>7</b> |           |           |           | <b>8</b>  |           |           |          |
| C        | 0.000000  | 0.000000  | -0.476732 | Al        | 1.608716  | 1.468830  | 0.000000 |
| Al       | 0.000000  | 0.000000  | -2.385569 | C         | 0.175111  | 0.159763  | 0.000000 |
| Al       | 0.000000  | -1.752741 | 0.285825  | Al        | 1.267472  | -1.505811 | 0.000000 |
| Mg       | 0.000000  | 0.000000  | 2.295454  | Al        | -1.421175 | 1.240455  | 0.000000 |
| Al       | 0.000000  | 1.752741  | 0.285825  | Mg        | -1.552544 | -1.315042 | 0.000000 |
| H        | 0.000000  | 3.121509  | -0.553696 | H         | -0.268615 | -2.632811 | 0.000000 |
| H        | 0.000000  | -3.121509 | -0.553696 | H         | -1.580625 | 2.839026  | 0.000000 |
| <b>9</b> |           |           |           | <b>10</b> |           |           |          |
| Al       | 0.209780  | -2.109942 | 0.000000  | H         | -1.238350 | 0.013148  | 0.000000 |
| C        | 0.008525  | -0.182010 | 0.000000  | C         | -0.320181 | -0.589045 | 0.000000 |
| Al       | 1.912384  | 0.270661  | 0.000000  | Al        | -1.298478 | -2.361885 | 0.000000 |
| Al       | -1.982364 | -0.486689 | 0.000000  | Al        | 0.998319  | 0.925477  | 0.000000 |
| Mg       | -0.477262 | 1.907259  | 0.000000  | Al        | 1.334627  | -1.651351 | 0.000000 |
| H        | 1.695340  | -2.786121 | 0.000000  | H         | 0.415964  | -3.113653 | 0.000000 |
| H        | -2.286574 | 1.452172  | 0.000000  | Mg        | -1.032572 | 3.465239  | 0.000000 |

|           |           |           |           |           |           |           |           |
|-----------|-----------|-----------|-----------|-----------|-----------|-----------|-----------|
| <b>11</b> |           |           |           | <b>12</b> |           |           |           |
| Mg        | 1.156677  | -1.937256 | -0.161867 | Mg        | 2.159004  | 1.168698  | 0.000000  |
| C         | 0.207748  | 0.041763  | 0.252377  | C         | 0.017857  | 0.248124  | 0.000000  |
| Al        | 1.441019  | 1.655126  | -0.267680 | Al        | -1.927842 | 1.173688  | 0.000000  |
| Al        | -1.429892 | -1.183924 | 0.207836  | Al        | 1.314630  | -1.323721 | 0.000000  |
| Al        | -1.213110 | 1.391579  | -0.390788 | Al        | -1.264695 | -1.352981 | 0.000000  |
| H         | 1.078668  | -0.011751 | 0.960893  | H         | 0.035532  | 1.382176  | 0.000000  |
| H         | 2.659630  | -2.773607 | -0.387500 | H         | 2.812910  | 2.780388  | 0.000000  |
| <b>13</b> |           |           |           | <b>14</b> |           |           |           |
| Mg        | 0.338400  | -2.725750 | 0.000000  | C         | -0.890355 | 1.073610  | -0.114207 |
| Al        | 0.938000  | -0.159340 | 0.000000  | Al        | -1.586091 | -0.744200 | -0.586071 |
| Al        | 0.742780  | 2.605160  | 0.000000  | Al        | 0.495953  | 2.453829  | -0.004748 |
| C         | -0.922580 | -0.878280 | 0.000000  | Al        | 0.813499  | 0.200711  | -0.952994 |
| Al        | -1.458360 | 0.977540  | 0.000000  | H         | -1.730287 | 1.554955  | 0.406271  |
| H         | 0.125260  | -4.454100 | 0.000000  | Mg        | 0.604397  | -2.548100 | 0.800442  |
| H         | -1.641250 | -1.713830 | 0.000000  | H         | 0.228404  | 3.899685  | 0.636229  |
| <b>15</b> |           |           |           | <b>16</b> |           |           |           |
| Mg        | 2.929512  | -0.001478 | -0.601481 | Mg        | -3.406666 | -0.162519 | 0.000000  |
| Al        | -0.310025 | -1.520759 | 0.317216  | Al        | -0.369436 | -0.912640 | 0.000000  |
| C         | 0.798766  | 0.007907  | 0.788179  | C         | -0.491907 | 1.015765  | 0.000000  |
| Al        | -2.271372 | -0.007089 | -0.486167 | Al        | 2.202954  | -0.928537 | 0.000000  |
| Al        | -0.322123 | 1.525280  | 0.310126  | Al        | 1.373348  | 1.538139  | 0.000000  |
| H         | 1.650609  | 0.014009  | 1.473146  | H         | -1.352538 | 1.688033  | 0.000000  |
| H         | -3.851581 | -0.010317 | -0.819727 | H         | 3.494721  | -1.892901 | 0.000000  |
| <b>17</b> |           |           |           | <b>18</b> |           |           |           |
| Mg        | -1.973376 | 1.530957  | 0.000000  | C         | -0.402372 | 0.835828  | 0.473203  |
| C         | -0.138397 | 0.095378  | 0.000000  | Al        | -1.529598 | -0.480061 | -0.435896 |
| Al        | -1.122272 | -1.609715 | 0.000000  | Al        | 1.298584  | -0.119697 | 0.325892  |
| Al        | 1.204671  | 1.400460  | 0.000000  | Mg        | -0.437869 | 3.025151  | -0.431180 |
| Al        | 1.565270  | -1.057275 | 0.000000  | H         | -0.716154 | 1.330567  | 1.401053  |
| H         | 0.666234  | -2.495306 | 0.000000  | Al        | 0.078402  | -2.492220 | 0.260580  |
| H         | 1.796019  | 2.867650  | 0.000000  | H         | 0.237737  | -1.172218 | -0.959222 |
| <b>19</b> |           |           |           | <b>20</b> |           |           |           |
| Mg        | 0.000000  | 0.000000  | 2.727107  | Mg        | -1.972113 | 0.896525  | 0.000000  |
| C         | 0.000000  | 0.000000  | 0.478031  | C         | 0.105994  | 0.017793  | 0.000000  |
| Al        | -1.722321 | 0.000000  | -0.300790 | Al        | 0.803125  | 1.854737  | 0.000000  |
| Al        | 1.722321  | 0.000000  | -0.300790 | Al        | -1.063445 | -1.570306 | 0.000000  |
| Al        | 0.000000  | 0.000000  | -2.169401 | Al        | 1.811540  | -0.875509 | 0.000000  |
| H         | -3.225125 | 0.000000  | 0.214645  | H         | 3.257332  | -0.137750 | 0.000000  |
| H         | 3.225125  | 0.000000  | 0.214645  | H         | -0.393802 | -3.043297 | 0.000000  |
| <b>21</b> |           |           |           | <b>22</b> |           |           |           |



|           |           |           |          |           |           |           |           |
|-----------|-----------|-----------|----------|-----------|-----------|-----------|-----------|
| C         | -0.858144 | 1.053710  | 0.000000 | C         | 0.191666  | 0.098059  | -0.263252 |
| Al        | -1.458218 | -0.836843 | 0.000000 | Al        | -1.584966 | -0.827699 | -0.373554 |
| Al        | 0.475620  | 2.513570  | 0.000000 | Al        | 1.440382  | 1.582612  | 0.242700  |
| Al        | 0.995223  | 0.104012  | 0.000000 | Al        | -1.029326 | 1.635898  | 0.437602  |
| H         | -1.772866 | 1.664527  | 0.000000 | H         | 1.033602  | -0.404668 | -0.770302 |
| Mg        | 0.702874  | -3.540608 | 0.000000 | Mg        | 0.989543  | -2.521927 | 0.566456  |
| H         | -0.022779 | 4.039663  | 0.000000 | H         | 3.004659  | 1.270504  | 0.036540  |
| <b>23</b> |           |           |          | <b>24</b> |           |           |           |
| C         | -0.114202 | 0.509393  | 0.000000 | Mg        | 0.000000  | 0.000000  | -2.179972 |
| Al        | 1.254310  | -0.941363 | 0.000000 | C         | 0.000000  | 0.000000  | -0.070059 |
| Al        | -0.758076 | 2.401005  | 0.000000 | Al        | 0.000000  | -1.968039 | -0.060902 |
| Al        | 1.602276  | 1.664798  | 0.000000 | Al        | 0.000000  | 1.968039  | -0.060902 |
| H         | -1.175625 | 0.206466  | 0.000000 | Al        | 0.000000  | 0.000000  | 1.845266  |
| Mg        | -1.528651 | -2.447250 | 0.000000 | H         | 0.000000  | -1.938467 | 1.760424  |
| H         | -2.353791 | 2.600632  | 0.000000 | H         | 0.000000  | 1.938467  | 1.760424  |
| <b>25</b> |           |           |          | <b>26</b> |           |           |           |
| Mg        | -1.136160 | -0.676341 | 0.000000 | Mg        | -1.372526 | -1.660398 | 0.000000  |
| C         | 0.174506  | 1.540585  | 0.000000 | C         | -1.311749 | 0.582306  | 0.000000  |
| Al        | 1.484721  | 0.159391  | 0.000000 | Al        | 0.639894  | 0.165954  | 0.000000  |
| Al        | -1.762843 | 1.842075  | 0.000000 | H         | -2.392877 | 0.339951  | 0.000000  |
| H         | 0.601091  | 2.560291  | 0.000000 | Al        | -0.521877 | 2.331601  | 0.000000  |
| Al        | 1.333223  | -2.514456 | 0.000000 | Al        | 1.460820  | -2.525811 | 0.000000  |
| H         | -2.332388 | 3.354565  | 0.000000 | H         | -1.118364 | 3.822609  | 0.000000  |
| <b>27</b> |           |           |          | <b>28</b> |           |           |           |
| C         | -0.373204 | -0.780675 | 0.000000 | Mg        | 0.108590  | -1.121420 | 0.000000  |
| Al        | -1.956670 | 0.402836  | 0.000000 | C         | 0.726430  | 0.946140  | 0.000000  |
| Al        | 0.945379  | 0.546711  | 0.000000 | H         | 1.766820  | 0.603400  | 0.000000  |
| Mg        | 1.802294  | -2.401031 | 0.000000 | Al        | -1.216680 | 1.169300  | 0.000000  |
| H         | -0.546339 | -1.856841 | 0.000000 | Al        | 0.848880  | 2.934060  | 0.000000  |
| Al        | 0.451399  | 3.164476  | 0.000000 | Al        | 0.416210  | -4.052160 | 0.000000  |
| H         | -0.663713 | 1.771592  | 0.000000 | H         | -1.009610 | 2.895850  | 0.000000  |
| <b>29</b> |           |           |          | <b>30</b> |           |           |           |
| Mg        | -1.805003 | 0.394870  | 0.000000 | Mg        | 2.562486  | 1.074577  | 0.000000  |
| Al        | -0.891140 | -2.244284 | 0.000000 | Al        | -0.044279 | 0.965878  | 0.000000  |
| C         | 0.952220  | -2.090837 | 0.000000 | C         | 1.268329  | -0.570383 | 0.000000  |
| Al        | 1.167422  | 2.388363  | 0.000000 | Al        | -2.375644 | -0.040087 | 0.000000  |
| Al        | 1.499374  | -0.338822 | 0.000000 | Al        | -0.457845 | -1.583774 | 0.000000  |
| H         | -3.395222 | 1.113638  | 0.000000 | H         | 2.167304  | -1.193279 | 0.000000  |
| H         | -0.469800 | 1.742542  | 0.000000 | H         | -3.914951 | 0.347029  | 0.000000  |

| <b>31</b> |           |           |          |  |
|-----------|-----------|-----------|----------|--|
| Mg        | -0.793814 | -2.001288 | 0.000000 |  |
| H         | -0.347160 | 1.352277  | 0.000000 |  |
| Al        | 1.773145  | -0.885120 | 0.000000 |  |
| Al        | -1.869733 | 0.580215  | 0.000000 |  |
| Al        | 1.526055  | 1.877740  | 0.000000 |  |
| C         | 1.108496  | -2.584616 | 0.000000 |  |
| H         | -2.884108 | 1.851882  | 0.000000 |  |
